# Supplementary material for: AIM2 nuclear exit and inflammasome activation in chronic obstructive pulmonary disease and response to cigarette smoke
Source: PubMed Central journal article supplement (PMC8141226; doi:10.1186/s12950-021-00286-4), 2021-05-22
Supplement: 12950_2021_286_MOESM1_ESM.pdf [file 12950_2021_286_MOESM1_ESM.pdf]

AIM2 NUCLEAR EXIT AND  
INFLAMMASOME ACTIVATION IN COPD  
AND RESPONSE TO CIGARETTE SMOKE

Supplementary Data

**Table S1.** AIM2 antibodies used in the study and their immunoreactivities

| # | Species    | Immunogen     | Paraffin sections |             | Cells/frozen sections |           | Supplier   |
|---|------------|---------------|-------------------|-------------|-----------------------|-----------|------------|
|   |            |               | Nucleus           | Cytoplasm   | Nucleus               | Cytoplasm |            |
| 1 | Rabbit pAb | aa250-300/354 | Dull/Bright       | Bright dots | Moderate              | Moderate  | Bioss      |
| 2 | Rabbit pAb | aa232-309     | Bright            | Bright dots | Moderate              | Moderate  | Abcam      |
| 3 | Rabbit pAb | aa93-342      | None              | None        | Bright/dull           | Moderate  | LifeSpan   |
| 4 | Goat pAb   | aa321-335     | Dull/None         | Bright      | Dull/None             | Bright    | Sigma      |
| 5 | Mouse mAb  | aa1-195       | Dull/Bright       | Rare dots   | Dull/Bright           | Rare dots | Santa Cruz |

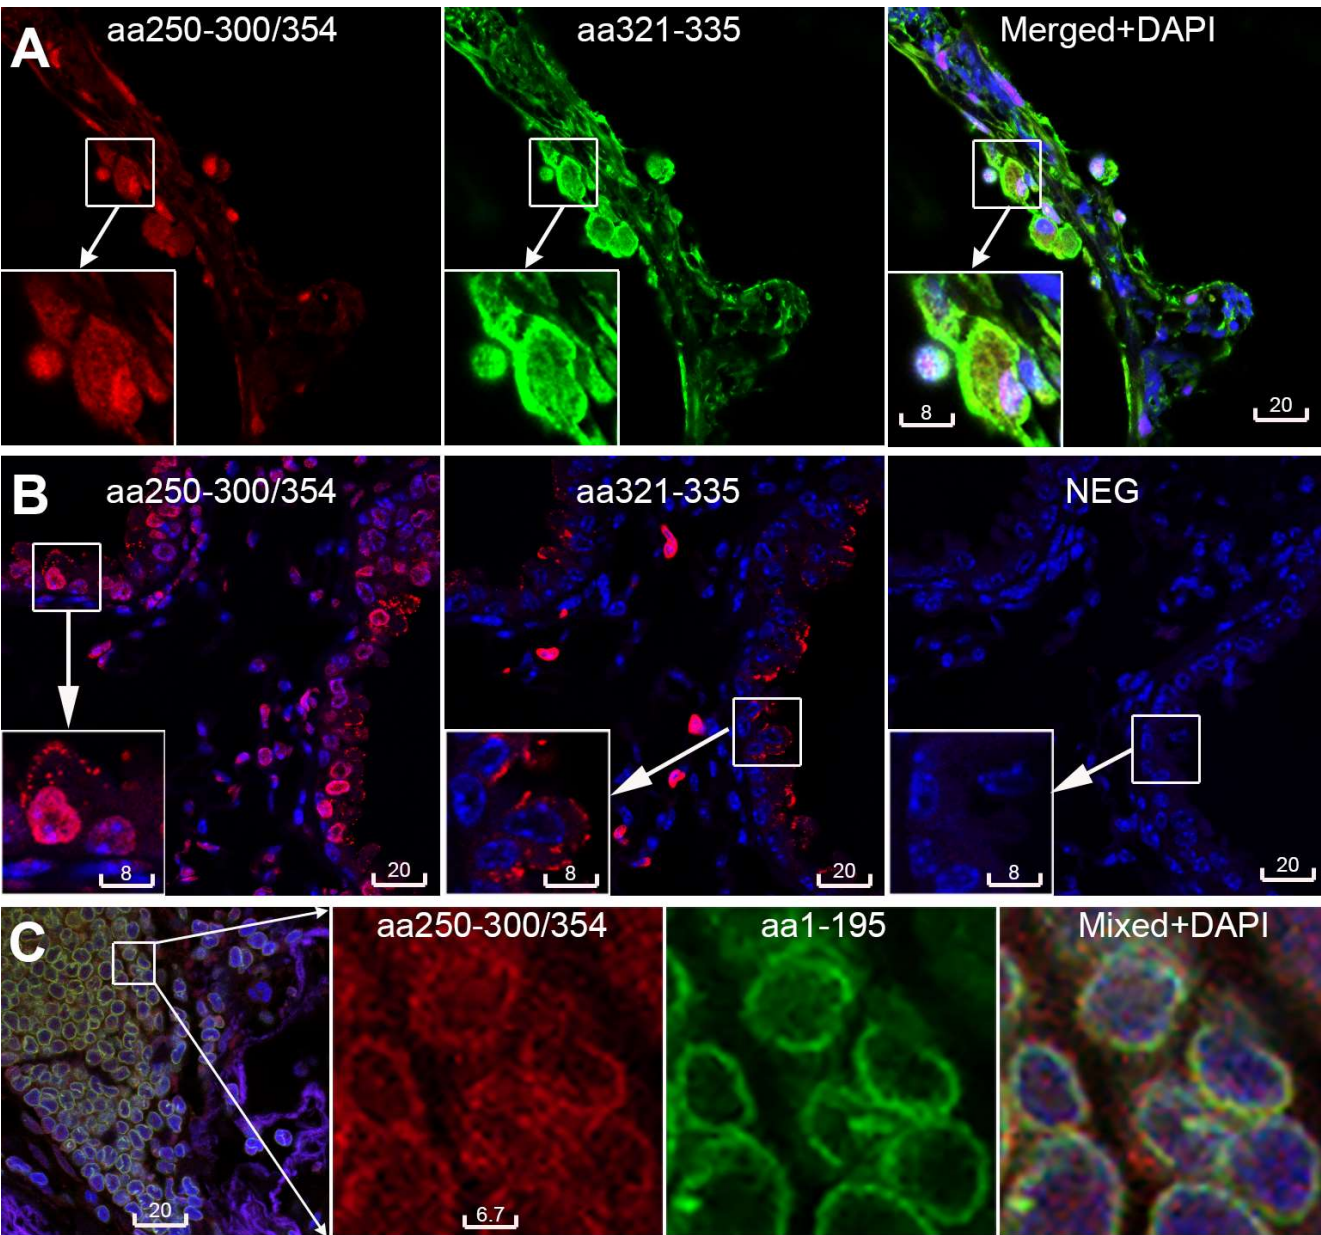

**Figure S1.** The majority of tested AIM2 antibodies displayed both nuclear and cytoplasmic immunoreactivity. **A:** Human frozen lung section co-labelled with Ab1 (red) and Ab4 (green). Inset is amplification of the boxed area depicting alveolar macrophages next to alveolar wall. **B:** Mouse paraffin lung section. AIM2 labeled in red by Ab1 and Ab4 in adjacent serial sections. NEG is a conjugate alone negative control. Shown are bronchiolar epithelial cells. **C:** Human lymph node in human lung, AIM2 labeled in red by a rabbit polyclonal (Ab1) and green by a mouse monoclonal (Ab5) on the same sections. Blue is DAPI. Scale bars are in micrometers. Amino acid sequences are indicated for epitope domains used for raising antibodies.

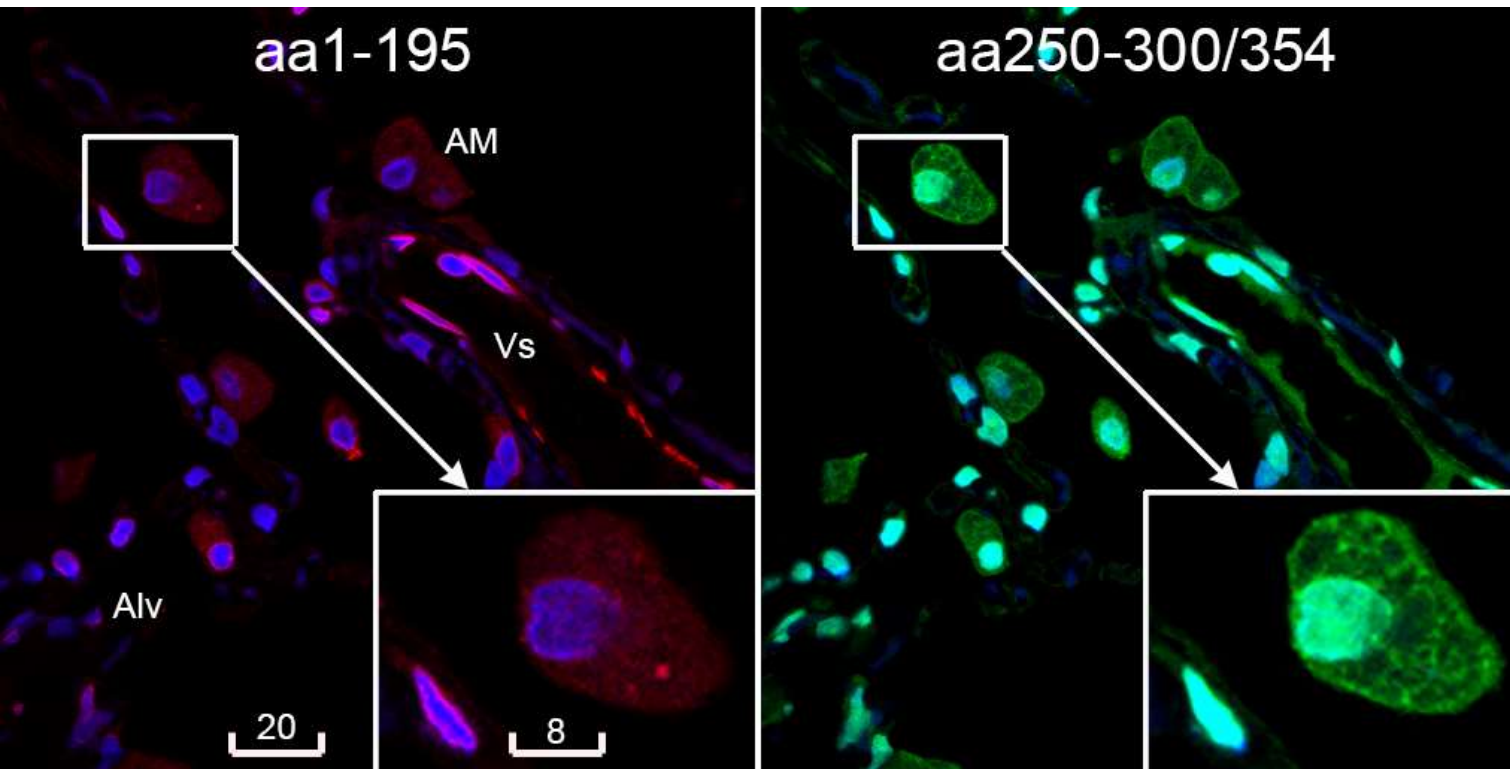

**Figure S2.** Nuclear and cytoplasmic localization of AIM2 expressed by different cell types in frozen sections of human lung biopsies. Shown is a representative confocal image of the same section labeled with a mouse monoclonal (Ab5, aa1-195, red) and a rabbit polyclonal (Ab1, aa250-300/354, green) antibodies, revealing similar nuclear and cytoplasmic patterns of subcellular localization. AM: alveolar macrophages, Alv: alveolar wall cells, Vs: microvessel. The inset is magnification of the boxed area, revealing a macrophage and an endothelial cell. Blue is DAPI. Merged colors magenta (left) and azure (right) indicate nuclear localization of AIM2. Scale bars are in micrometers.

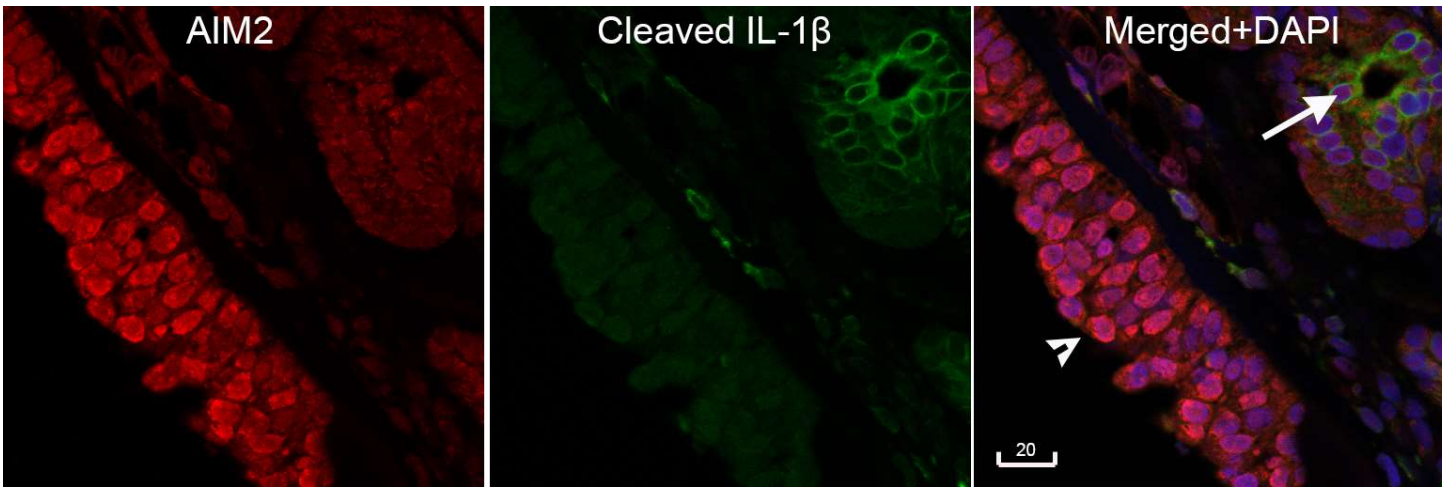

**Fig S3.** Immunolocalization of AIM2 (red) and cleaved IL-1 $\beta$  (green) in a representative turbinate biopsies. Arrowhead: strong AIM2 nuclear signal in surface epithelium. Arrow: reduced nuclear AIM2 in glandular epithelium associated with increased cleaved IL-1 $\beta$  (green).

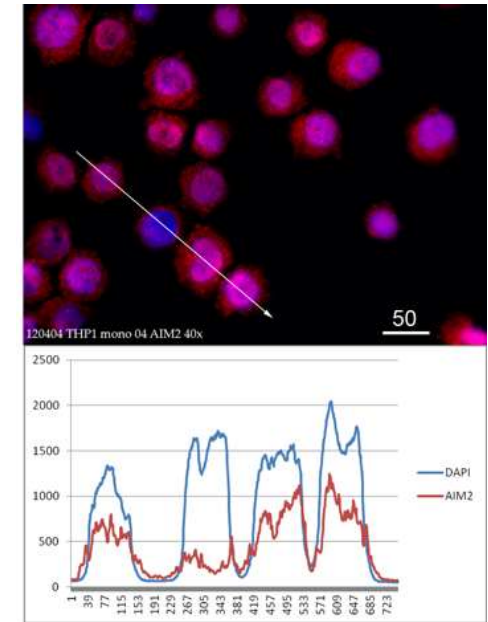

**Fig S4.** Nuclear AIM2 in undifferentiated THP-1 monocytes. Ab #2 (aa232-309). Top: Microphoto taken with conventional immunofluorescence microscope. Bottom: Line profile analysis showing nuclear exit of AIM2 in the second right cell.

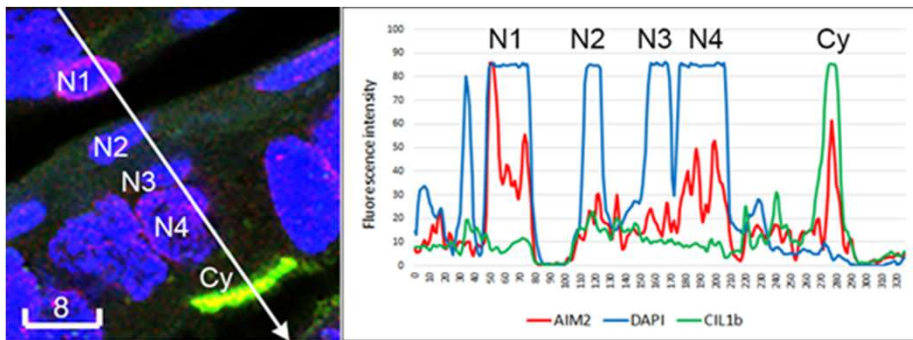

**Fig S5.** Line profile analysis of subcellular localization of AIM2 and cleaved IL-1 $\beta$  in a COPD II patient's airway. Shown are 4 nuclei, having relatively high AIM2 which (N1) or reduced AIM2 (N2,3,4). A cytoplasmic cluster of AIM2 is colocalized with cleaved IL-1 $\beta$  (Cy). Lines in the graph are colored in red for AIM2, green for cleaved IL-1 $\beta$ , and blue for DAPI

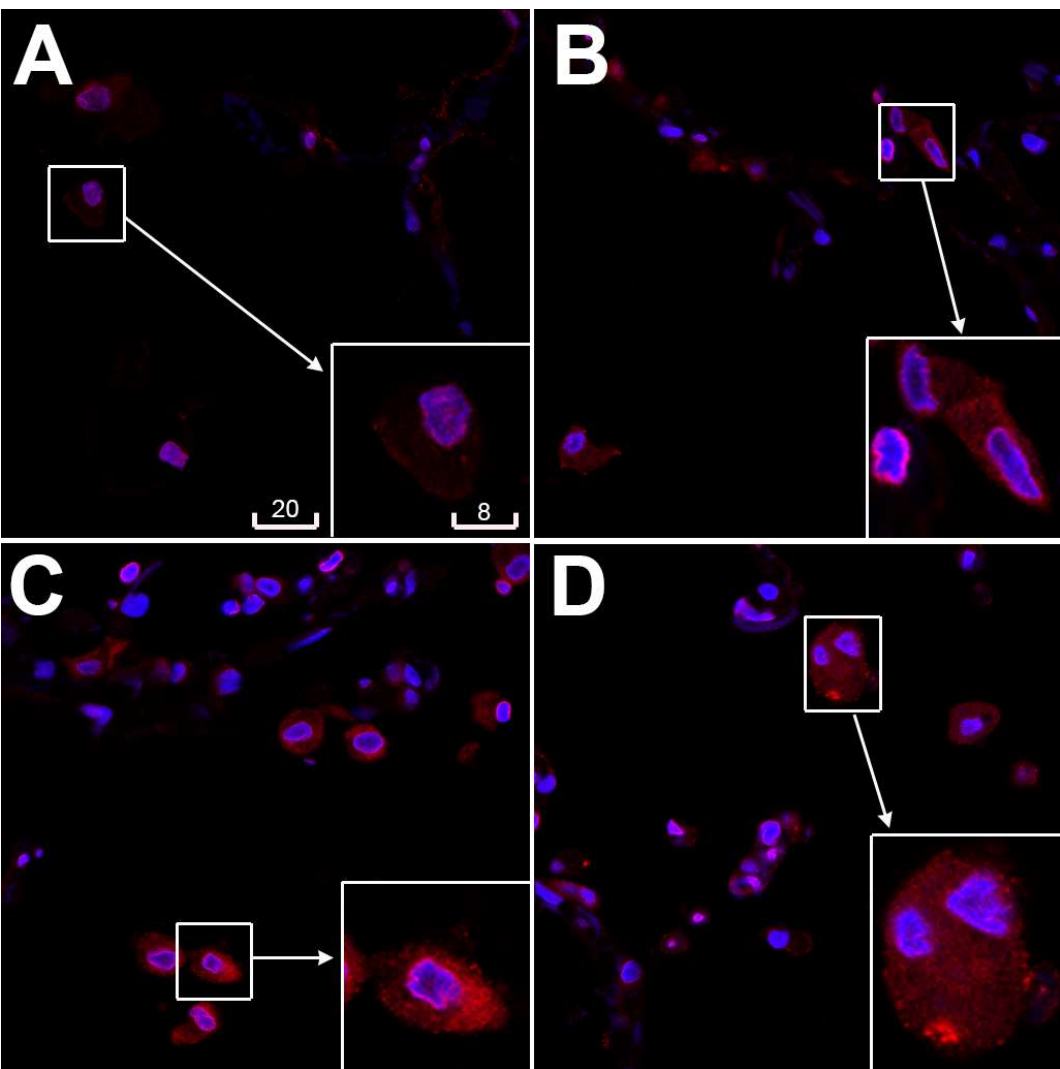

**Figure S6.** Subcellular localization of AIM2 in frozen sections of lung biopsies from non-COPD control patients (A and B) and from COPD patients (C and D). AIM2 (red) was labeled with a mouse monoclonal antibody (aa1-195). Blue is DAPI. Scale bars are in micrometers.

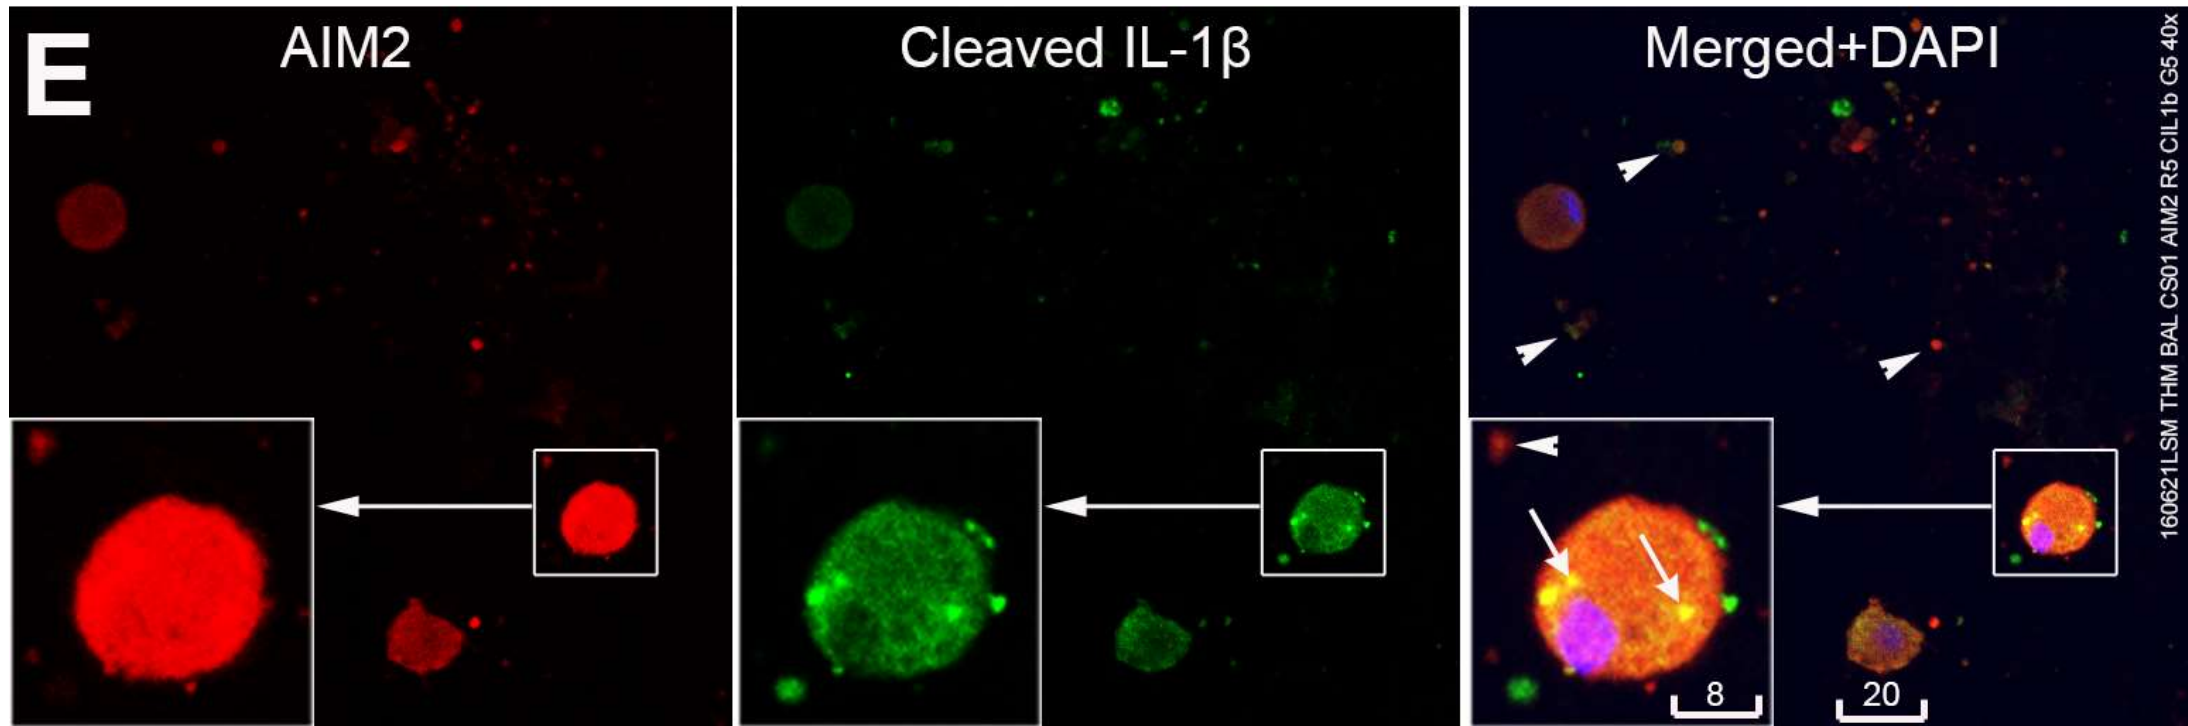

**Figure S7.** Representative confocal image of cigarette smoke extract-treated alveolar macrophages, showing intracellular (short arrows) and extracellular (arrowheads) of cleaved IL-1 $\beta$  particles colocalized with AIM2. Blue is DAPI. Scale bars are in micrometers.
